# Supplementary material
Source: PubMed Central journal article supplement (PMC2964235)
Supplement: 1005595107_sapp.pdf [file 1005595107_sapp.pdf]

## Supporting Information

### Materials and Methods

**Animal model and Cell cultures.** To generate mutant males (*Mecp2*<sup>-y</sup>, KO) and their control (*Mecp2*<sup>+y</sup>, WT) littermates, heterozygous females (*Mecp2*<sup>tm1.1Jae/+</sup>) were mated with wild-type males (*Mecp2*<sup>+y</sup>). The offspring from the breeding were genotyped by PCR as previously described (1).

Cortical and cerebellar neurons were isolated from postnatal day (P) 0 cortices and P6 cerebella respectively and were cultured as previously described (1-3). All animal experiments were done in accordance with the protocols approved by the Animal Research Committee of the University of California, Los Angeles.

**SOLiD sequencing and data analysis.** In the 1<sup>st</sup> sequencing experiment, total RNA of cerebellum (CB) tissues was isolated from WT and KO littermates at postnatal 6-week (pre- or early-symptomatic stage) using Trizol (Invitrogen). Four pairs of WT and KO CB were pooled for constructing sequencing libraries as previously described (4). Briefly, RNA was ligated overnight with the 'A' adapters, reversed transcribed, and amplified before size selection (18-30 nt inserts). After amplification using emulsion PCR, libraries were deposited on slides and sequenced by the SOLiD v2 sequencing system (Applied Biosystems). WT and KO samples were distinguished by adding unique barcode-attached amplification primers (provided by the SOLiD SREK kit). After the usual sequencing reactions, a second set of reactions decoded the barcode sequence. Sequencing results were obtained as 'good' and 'best' beads in colorspace (.csfasta format; a total of 3,660,124 reads in WT and 2,789,136 reads in KO were obtained) by the SOLiD sequence analysis software. The sequencing reads were aligned to all 590 annotated mouse miRNA precursor sequences (miRBASE version 15, retrieved from <ftp://mirbase.org/pub/mirbase/>) by the SHRiMP program (version 1.1.0) with default parameters (5) (**Table S1**). Mapped reads were loaded into a MySQL database and overlapping alignments were analyzed for read counting using custom Python scripts. We have focused on high confidence alignments by selecting those having 10 or more overlapping sequencing reads aligned to annotated miRNA precursors. The resulting miRNA expression profiles identified 315 miRNA genes (specifying 494 mature miRNAs or their anti-sense sequences) in WT cerebella. Mature miRNAs with more than 1.5-fold difference in read counts between WT and KO were identified as dys-regulated miRNAs (**Table S2**). Sequences of other small non-coding RNAs were retrieved from the Rfam database release 10 (rRNAs, snRNAs and snoRNAs, <ftp://ftp.sanger.ac.uk/pub/databases/Rfam/>) and the genomic transfer RNA database (tRNA, <http://lowelab.ucsc.edu/GtRNAdb/download.html>)(6, 7). Read count of non-coding RNAs in WT and KO cerebella (6-week) were normalized to the total read number of Rfam ncRNAs (89,901 reads in WT; 88,926 reads in KO) or tRNAs (24,839 reads in WT; 13,568 reads in KO). Rfam ncRNAs and tRNAs with

more than 1.5-fold difference in read counts between WT and KO were identified as dys-regulated small RNAs (**Table S4**).

In the 2<sup>nd</sup> sequencing experiment, we have isolated the small RNA population from two litters of WT and KO littermates (one control and two mutant mice in each litter, six animals in total) at postnatal 8-week (symptomatic stage) using PureLink miRNA isolation kit (Invitrogen). We subsequently prepared small RNA libraries for each animal and sequenced individual library separately according to small RNA sequencing procedures of the SOLiD total RNA-seq kit protocol (Applied Biosystems, or ABI). Analysis of small RNA raw datasets (csfasta files) was done with ABI SOLiD's small RNA Analysis Tool V0.50 (RNA2MAP). All raw reads are aligned to filter sequences that include rRNA, tRNA, adaptor, polyA, polyG, polyT and polyC sequences. Alignment is based only on the first 25 bases of the read with 2 mismatches allowed. The remaining reads that have no alignment to the filter sequences are subsequently mapped to annotated mouse miRNA precursor sequences. Alignment is based on first 18 bases of the read with 3 mismatches allowed. Once an alignment is found, the algorithm attempts to find the adaptor location. A test read is created by combining bases from the genome and adaptor sequence and compared against the full length read, a step that tries all possible starting points of the adaptor. The one that minimizes the number of mismatches is used and the small RNA size is determined. The reads that align give rise to the statistics in the "Mapping to miRBASE column (**Table S1**). Remaining reads (reads that do not map to filter sequences or miRBASE sequences) are then aligned to the reference genome (mm9). Finally, the total mappable reads is obtained by adding the total mappable reads from both miRBASE and mm9 alignment (**Table S1**). By combining all sequencing results, expression of 253 (specifying 370 mature miRNAs or their anti-sense sequences) miRNA genes were detected in all 6 small RNA libraries of cerebella. To identify dys-regulated miRNAs in KO cerebella at the symptomatic stage, fold change (FC) between WT and KO for each detected mature miRNAs were calculated in two complementary approaches. In the first approach, the read count in each KO was divided with that of its WT littermate, thus evaluating the data by taking into account the potential difference between litters. In the second approach, we calculated the fold change for each miRNAs by dividing the read count in KO with an averaged read count in WT from two litters. In each approach, a total of 4 FC values were obtained and subsequently averaged for each expressed mature miRNAs. Mature miRNAs with at least a 1.5-fold change in read counts between WT and KO (and 3 out 4 FC values show same trend) in both approaches were identified as dys-regulated miRNAs (**Table S3**).

**TaqMan real-time PCR quantification of microRNA.** Total RNA was isolated using Trizol and quantified by Nanodrop spectrophotometer (Agilent). 50 ng total RNA was used for reverse transcription of individual miRNA (TaqMan® MicroRNA Reverse Transcription Kit, Applied Biosystems) and TaqMan real-time PCR (Applied Biosystems). MicroRNA reverse transcription and TaqMan PCR (TaqMan® Universal PCR Master Mix, No UNG, Applied Biosystems) were performed in 96-well format using an iCycler real-

time PCR instrument (Bio-Rad). Reactions were done in triplicates and standard curves were generated for several miRNAs (e.g. miR-124a) using serial dilutions of cerebellar total RNAs to evaluate the dynamic range of TaqMan qPCR assays. Fold change was calculated between *Mecp2*<sup>+/-</sup> and *Mecp2*<sup>-/-</sup> cerebellum using  $2^{-\Delta\Delta Ct}$  method after normalized to the level of endogeneous U6 spliceosomal RNA.

**Chromatin immunoprecipitation (ChIP) and Mecp2 ChIP-chip.** To immunoprecipitate chromatin bound by Mecp2 using a previously validated polyclonal antibodies (8), cerebella isolated from four pairs of *Mecp2*<sup>+/-</sup> and *Mecp2*<sup>-/-</sup> littermates (postnatal 6-week) were homogenized and cross-linked with 1% formaldehyde for 10 minutes at room temperature followed by exposure to 0.125 M glycine to stop the cross-linking reaction. After two washes with ice-cold PBS, cells were collected as pellets and stored at -80°C before use. Nuclei were extracted and lysed sequentially with lysis buffer 1 (LB1, 50 mM Hepe2-KOH, pH7.5, 140 mM NaCl, 1 mM EDTA, 10% glycerol, 0.5% NP40, 0.25% Triton X-100), lysis buffer 2 (LB2, 10 mM Tris-HCl, pH8.0, 200 mM NaCl, 1 mM EDTA, 0.5 mM EGTA), and lysis buffer 3 (LB3, 10 mM Tris-HCl, pH8.0, 100 mM NaCl, 1 mM EDTA, 0.5 mM EGTA, 0.1% Na-Deoxycholate, 0.5% N-lauroylsarcosine). Chromatin was sonicated using a microtip (Branson sonifier 450) until the DNA fragments were reduced to 200-1000 bp in length. 10 µg antibodies were pre-incubated with 100 µl Dynal protein-G beads (Invitrogen) for at least 6 hours. Immunoprecipitation was performed overnight at 4°C with antibody conjugated protein-G beads. DNA/protein complexes were washed with RIPA buffer (50 mM Hepes-KOH, pH7.6, 500 mM LiCl, 1 mM EDTA, 1% NP-40, 0.7% Na-Deoxycholate) for 5 times and eluted from beads and reverse cross-linked at 65 °C overnight. The DNA was digested with RNase A and proteinase K sequentially, followed by phenol/chloroform extraction and ethanol precipitation.

For microarray analyses, we amplified input and immunoprecipitated DNA using whole genome amplification kits (WGA, Sigma). For hybridization with customized NimbleGen 385K DNA tiling microarray (covering approximately -3.25kb to +0.75kb genomic regions relative to TSS of ~17,000 annotated protein-coding Refseq genes and -4.0kb to +4.0kb genomic regions flanking of 469 annotated mouse miRNA genes; ~100-bp per probe). For hybridization with NimbleGen microarrays, 4 µg of amplified input and ChIP DNA was sent to NimbleGen. Sample labeling, hybridization, data extraction and peak detection were performed according to standard procedures by NimbleGen Systems. Two separate hybridizations using biological independent samples (pooled from four pairs of WT and KO cerebella, postnatal 6-week) were performed and yielded similar results. We combined and averaged the signals from replicate arrays.

For identification of probes associated with significant level of Mecp2 occupancy, a non-parametric one-sided Kolmogorov-Smirno (KS) test was used. Briefly, from the scaled log<sub>2</sub>-ratio data, a fixed-length window (750bp) is placed around each consecutive probe and the one-sided KS test is applied to determine whether the probes are drawn from a significantly more positive distribution of intensity log-ratios than those in the rest of the array. The resulting score for each probe is the -log<sub>10</sub> P-

value from the windowed KS test around that probe. Using NimbleScan software (NimbleGen), peak data files are generated from the P-value data files. NimbleScan software detects peaks by searching for at least 2 probes above a P-value minimum cutoff ( $-\log_{10}$ ) of 2. Peaks within 500bp of each other are merged.

ChIP-qPCR was performed in an iCycler (Bio-Rad) using iQ SYBR Green Supermix (Bio-Rad). Reactions were done in triplicates and standard curves were calculated on serial dilutions of input genomic DNA. For quantification of relative level of MeCP2 occupancy, we calculated the percentage of immunoprecipitated DNA over input DNA. Primer sequences used in real-time PCR are listed below:

*Mmu-miR-10a*: forward 5'- GCCTTTGATCTTCTTCTCAGGTTG -3',  
reverse 5'- GGTGTGAAGGGGGTGTAAATAAAG -3';

*Mmu-miR-34c*: forward 5'- TACCTGGTTAAGTGGGCTGAGTTC -3',  
reverse 5'- CTGGCTTTAGGATCTCCATTTTCAG -3';

*Mmu-miR-137*: forward 5'- AAGGATGAGTTGGTCTACCTGGAG -3',  
reverse 5'- AGTGCAAATAGCTCTCCATCAAGG -3';

**Methylated DNA immunoprecipitation (MeDIP) and MeDIP-chip.** MeDIP assays were carried out as previously described (9). Briefly, cerebellar genomic DNA (6-week) was digested with proteinase K and RNase A sequentially, and purified by phenol/chloroform extraction. Purified genomic DNA was sonicated and heat-denatured (95 °C, 10 min). An aliquot of sonicated genomic DNA was saved as input. Fragmented genomic DNA was immunoprecipitated with a monoclonal antibody against 5-methylcytidine (Eurogentec) at 4 °C overnight in a final volume of 500  $\mu$ l of IP buffer (10 mM sodium phosphate (pH 7.0), 140 mM NaCl, 0.05% Triton X-100). We incubated the DNA-antibody mixture with 30  $\mu$ l protein G Dynabeads (Invitrogen) for 2 h at 4 °C and washed it three times with 1 ml IP buffer. We then treated the beads with proteinase K for at least 3 h at 55 °C and purified the methylated DNA by phenol-chloroform extraction followed by ethanol precipitation. For real-time PCR analysis, 10 ng of input genomic DNA and 1/30 of the immunoprecipitated (IP) methylated DNA was used for each PCR reaction. MeDIP-qPCR was performed in an iCycler (Bio-Rad) using iQ SYBR Green Supermix (Bio-Rad). Reactions were done in triplicates and standard curves were calculated on serial dilutions of input genomic DNA. ChIP-qPCR primers were used in MeDIP-qPCR to quantify the relative DNA methylation level within the regions occupied by MeCP2. For microarray analyses, we amplified input and immunoprecipitated DNA using whole genome amplification kits (WGA, Sigma). Labeling, hybridization, array processing and data extraction were done following procedures described for ChIP-chip.

**Sequenom EpiTYPER DNA Methylation Analysis.** We carried out bisulphite conversion of 1 µg genomic DNA using EZ DNA methylation-Gold Kit (Zymo) as previously described (9). Sequenom MassARRAY® MALDI-TOF mass spectrometry (MS) analysis of bisulphite converted DNA was performed in triplicate (EpiTYPER DNA Methylation Analysis). Primers were designed using Sequenom's EpiDesigner tool (<http://www.epidesigner.com>). The results were similar to those from MeDIP-qPCR.

**Luciferase reporter assay and transfections.** For luciferase report assays, we cloned *Nrxn3* and *Bdnf* 3' UTR sequences into the pISO fly luciferase construct (10). MiRNA mimics duplexes or 2'-O-methyl miRNA inhibitors (Dharmacon) and pISO luciferase vector were co-transfected into mouse (cortical or cerebellar) neurons using Lipofectamine 2000 (Invitrogen) together with a TK renilla luciferase reporter (Promega). Approximately 24 h after transfection, cells were lysed for dual luciferase assays (Promega). The following primers were used for cloning of 3' UTRs:

*Nrxn3*: forward 5'- GAGCTCtactctcacagagggcaatgtgc -3'

reverse 5'- TCTAGAataaacatgcacatcacacaggg -3'

*Bdnf*: forward 5'- GAGCTCgtcctagagaaagtcccggatcc -3'

reverse 5'- TCTAGAgagatacatcatgggcagtggag-3'

**BDNF ELISA and electroporation of cortical neurons.** A BDNF ELISA kit (Promega) was used to measure BDNF protein levels as per the manufacturer's instructions. All solutions were made exactly as recommended by the kit instructions. Cell lysate was treated with acid to increase the amount of free BDNF. A SPECTRAMax microplate reader (Molecular Devices) was used to measure signal intensity from the wells. A standard curve was generated from the BDNF standard wells on each plate, using the SoftMax Pro 4.6 software. The amount of BDNF per well was calculated by based on the standard curve. To measure the effect of dys-regulated miRNAs (miR-30a/d, miR-381 and miR-495) on endogenous BDNF expression, freshly isolated cortical neurons were electroporated (Lonza/Amara, program#: G-013) with 40 pmol miRNA duplex mimics or 2'-O-Methyl miRNA inhibitors (final concentration: 20 µM in medium, Dharmacon) and analyzed 6 days post-transfection. To validate the activity-dependent induction of BDNF, the cortical neurons were depolarized in presence of 50mM KCl for 24 h before harvested for ELISA analysis. MiRNA mimics or inhibitor for a *C. elegans* specific miRNA (Dharmacon), cel-miR-67, was used as a control in all ELISA assays.

**Lentivirus-mediated knockdown of *Mecp2* in cortical neurons.** A lentiviral vector encoding shRNA specific for mouse *Mecp2* (NM\_010788, Sigma MISSION™ TRC shRNA set) was used for silencing *Mecp2* expression (TRCN0000039081, targeting CDS, 5'- CCGGGCTGGAAAGTATGATGTATATCTCGA

GATATACATCATACTTTCCAGCTTTTTG-3'). A control shRNA vector (SHC002, The MISSION™ Non-Target shRNA Control Vector, Sigma), which contains a shRNA sequence that does not target human and mouse genes (>4 base pair mismatches to any known human or mouse gene), was used as a negative control for Mecp2 knockdown shRNAs. Knockdown efficiency of endogenous Mecp2 in cortical neurons was monitored by immunoblotting using polyclonal antibodies specific for Mecp2 (Millipore, 07-013).

Lentiviral vector was co-transfected with other helper vectors into HEK-293T cells as previously described (9). Packaged lentiviral particles were harvested at 48h and 72h post transfection. Harvested lentiviral particles were then combined and concentrated. For Bdnf ELISA assays, electroporated postnatal (P0) cortical neurons were transduced with control or Mecp2 shRNA expressing lentiviruses in presence of 4 µg ml<sup>-1</sup> polybrene overnight and analyzed 6 days post-infection.

**Statistical analyses.** Paired two-tailed t-test was used for all pair-wise comparisons between WT and KO littermates. A one-way analysis of variance (ANOVA) with Dunnett's post test was used for calculating the significance between a single control and multiple treatment groups in luciferase and BDNF ELISA assays. A hypergeometric test was used to test the significance of relative enrichment of a subset of genes. Statistical analysis was performed using Prism4 (GraphPad) and R.

## References for Supporting Information

1. Tao J, *et al.* (2009) Phosphorylation of MeCP2 at Serine 80 regulates its chromatin association and neurological function. *Proc Natl Acad Sci U S A* 106(12):4882-4887.
2. Martinowich K, *et al.* (2003) DNA methylation-related chromatin remodeling in activity-dependent BDNF gene regulation. *Science* 302(5646):890-893.
3. Bonni A, *et al.* (1999) Cell survival promoted by the Ras-MAPK signaling pathway by transcription-dependent and -independent mechanisms. *Science* 286(5443):1358-1362.
4. Goff LA, *et al.* (2009) Ago2 immunoprecipitation identifies predicted microRNAs in human embryonic stem cells and neural precursors. *PLoS One* 4(9):e7192.
5. Rumble SM, *et al.* (2009) SHRiMP: accurate mapping of short color-space reads. *PLoS Comput Biol* 5(5):e1000386.
6. Gardner PP, *et al.* (2009) Rfam: updates to the RNA families database. *Nucleic Acids Res* 37(Database issue):D136-140.
7. Chan PP & Lowe TM (2009) GtRNAdb: a database of transfer RNA genes detected in genomic sequence. *Nucleic Acids Res* 37(Database issue):D93-97.
8. Hu K, Nan X, Bird A, & Wang W (2006) Testing for association between MeCP2 and the brahma-associated SWI/SNF chromatin-remodeling complex. *Nat Genet* 38(9):962-964; author reply 964-967.
9. Wu H, *et al.* (2010) Dnmt3a-dependent nonpromoter DNA methylation facilitates transcription of neurogenic genes. *Science* 329(5990):444-448.
10. Yekta S, Shih IH, & Bartel DP (2004) MicroRNA-directed cleavage of HOXB8 mRNA. *Science* 304(5670):594-596.

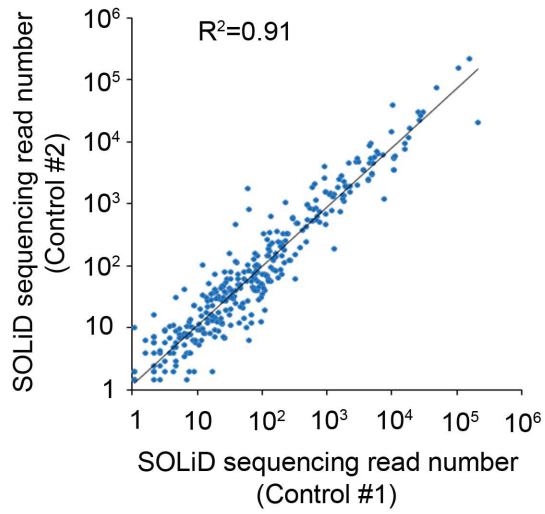

Fig. S1. SOLiD RNA-seq assays generate highly reproducible miRNA expression profiles. Shown is the scatterplot of two SOLiD small RNA sequencing experiments of microRNAs in control cerebellum tissues (postnatal 8-week).

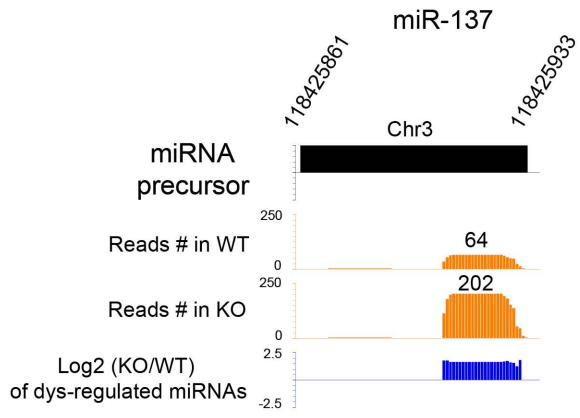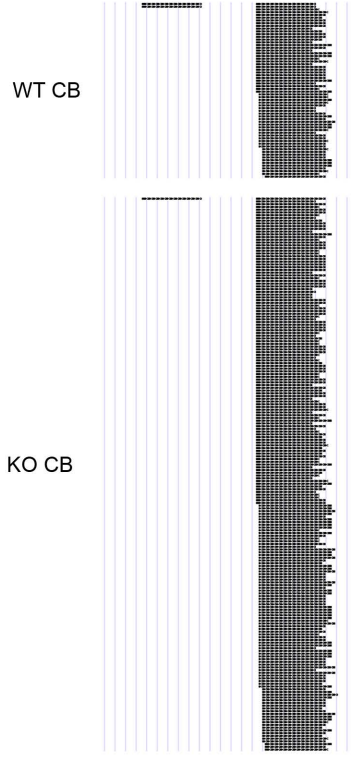

Fig. S2. Representative genomic mapping of SOLiD sequencing reads to an annotated mouse miRNA gene locus (mmu-miR-137, mm8).



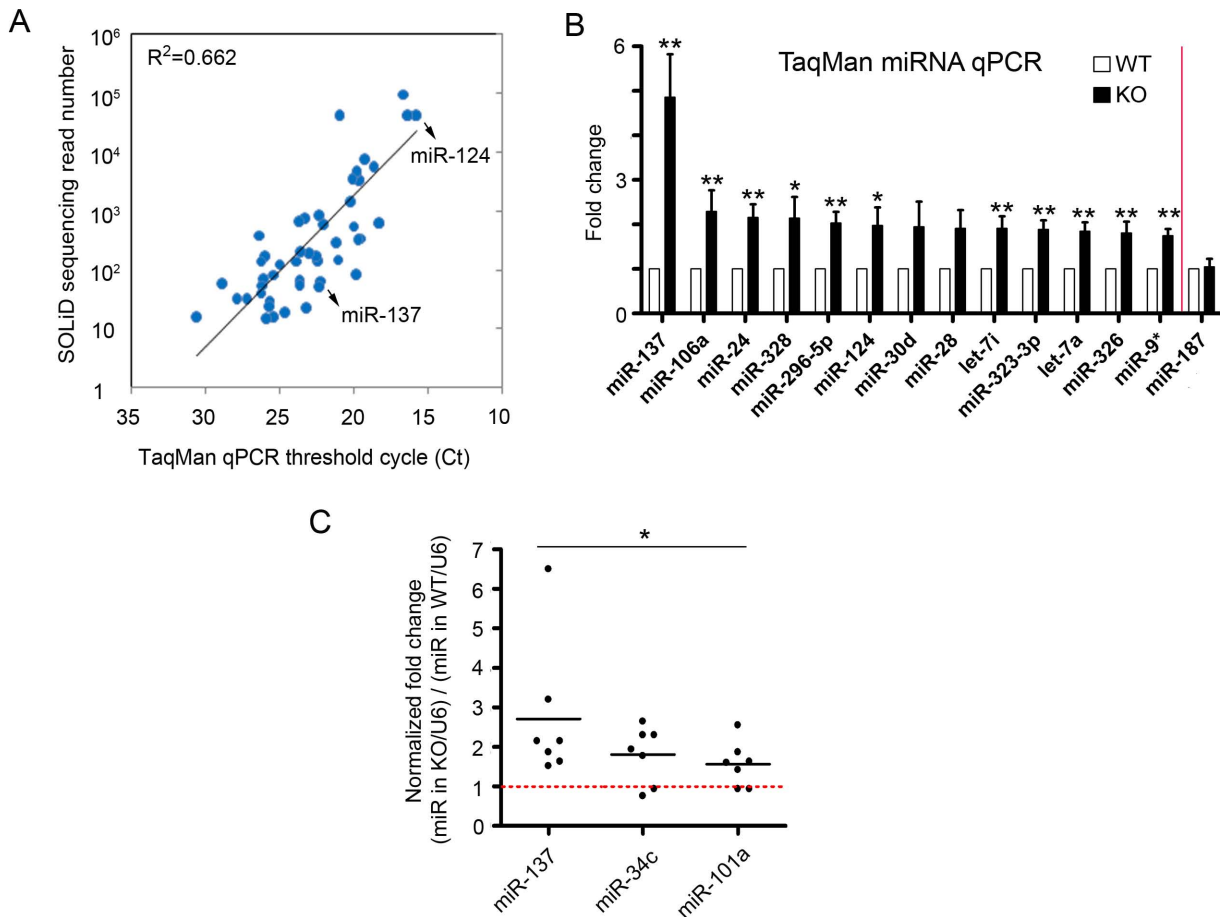

Fig. S3. TaqMan miRNA qPCR validation of SOLiD small RNA sequencing results.

(A) MiRNA expression levels measured by the SOLiD sequencing correlate well with TaqMan qPCR assays. Note that miR-124 is a highly transcribed neuronal specific miRNA.

(B) TaqMan miRNA qPCR analysis of 14 miRNAs in WT and KO cerebella at (pre-/early-symptomatic stage, 6-wk). Note that miR-187 was used as a negative control. MiRNA expression was normalized to levels of the ubiquitously expressed U6 snRNA. Error bars represent standard error of mean, s.e.m. ( $n=4$  pairs,  $* < 0.1$ ,  $** < 0.05$ ; paired two-tailed Student's  $t$ -test).

(C) TaqMan miRNA qPCR analysis of 3 miRNAs in WT and KO cerebella at (symptomatic stage, 8-wk). Note that miR-137 was also up-regulated at 6-wk. MiRNA expression was normalized to levels of the ubiquitously expressed U6 snRNA.  $* < 0.05$ , paired two-tailed Student's  $t$ -test.

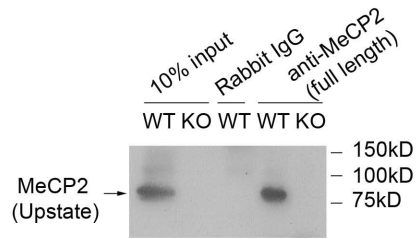

Fig. S4. Validation of the antibody used for ChIP-chip of Mecp2.

Polyclonal antibodies used in ChIP-chip assays are qualified to immunoprecipitate endogenous MeCP2 under ChIP conditions (formaldehyde cross-linking). Commercially available polyclonal antibodies to C-terminus of MeCP2 (Millipore/Upstate) was used for immunoblotting of immunoprecipitated MeCP2 (~75kD). Non-specific rabbit IgG was used as a negative control. Immunoprecipitation was performed in both wild-type (WT) and MeCP2 mutant (KO) cerebellum.

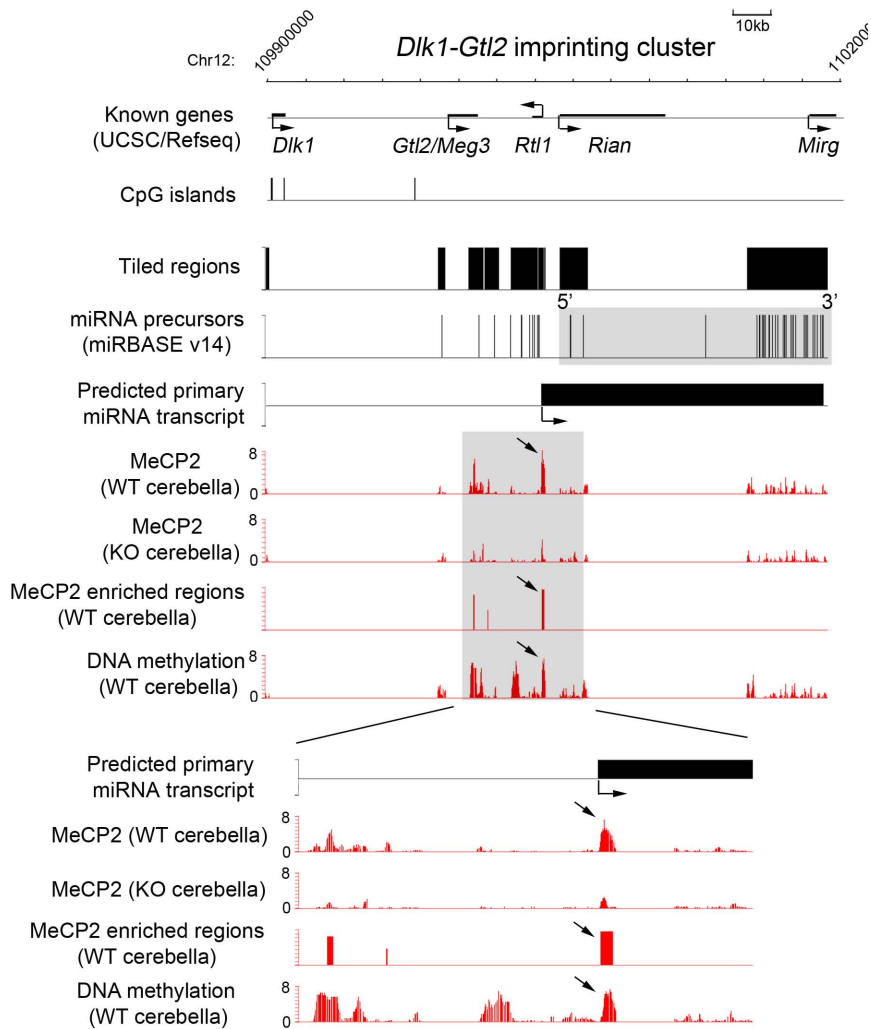

Fig. S5. MeCP2 bound and DNA methylated regions within the *Dlk1-Gtl2* imprinting domain are independently validated promoter tiling microarrays. MeCP2 occupancy and DNA methylation ( $-\log_{10}(P\text{-value})$ ) within the *Dlk1-Gtl2* imprinting domain were also determined by NimbleGen promoter arrays. Genomic positions for the large polycistronic cluster of miRNA are highlighted.

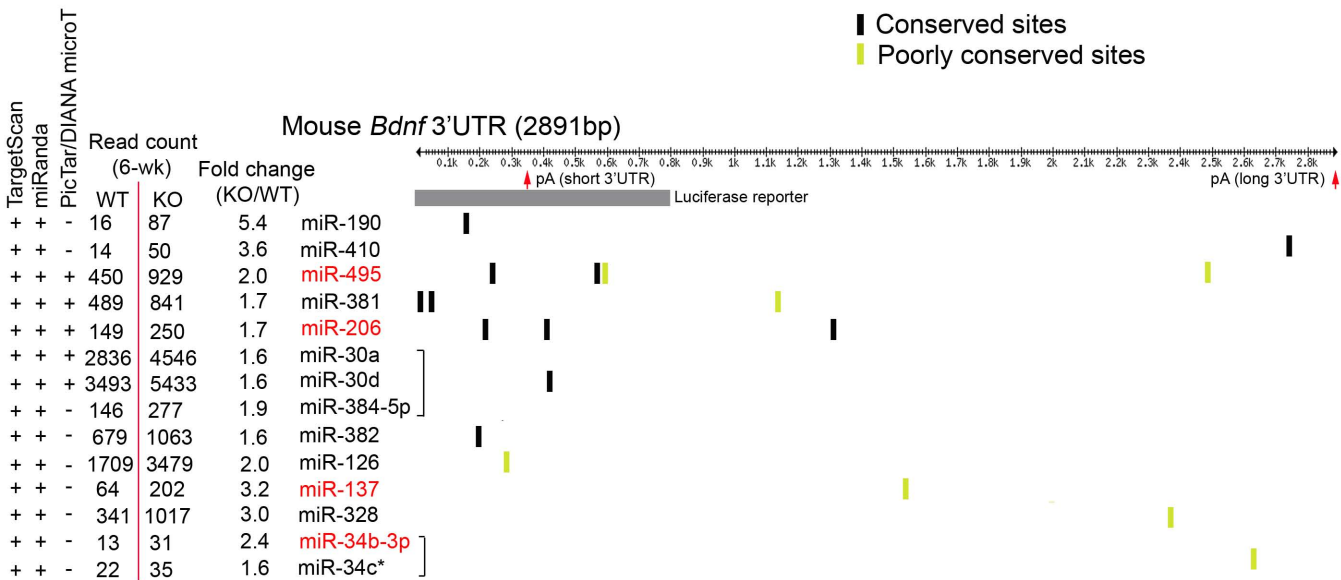

Fig. S6. Summary of SOLiD sequencing read counts for all aberrantly up-regulated miRNAs in KO cerebella that are predicted to target the full-length mouse *Bdnf* 3' UTR. Two alternative polyadenylation (pA) sites are indicated by red arrows. Also shown are aberrantly up-regulated miRNAs at the pre-/early-symptomatic stage that are predicted to target *Bdnf* 3' UTR by at least two independent algorithm (TargetScan, miRanda or PicTar/DIANA microT). MiRNAs up-regulated at both pre-/early-symptomatic (6-wk) and symptomatic stage (8-wk) are highlighted in red.

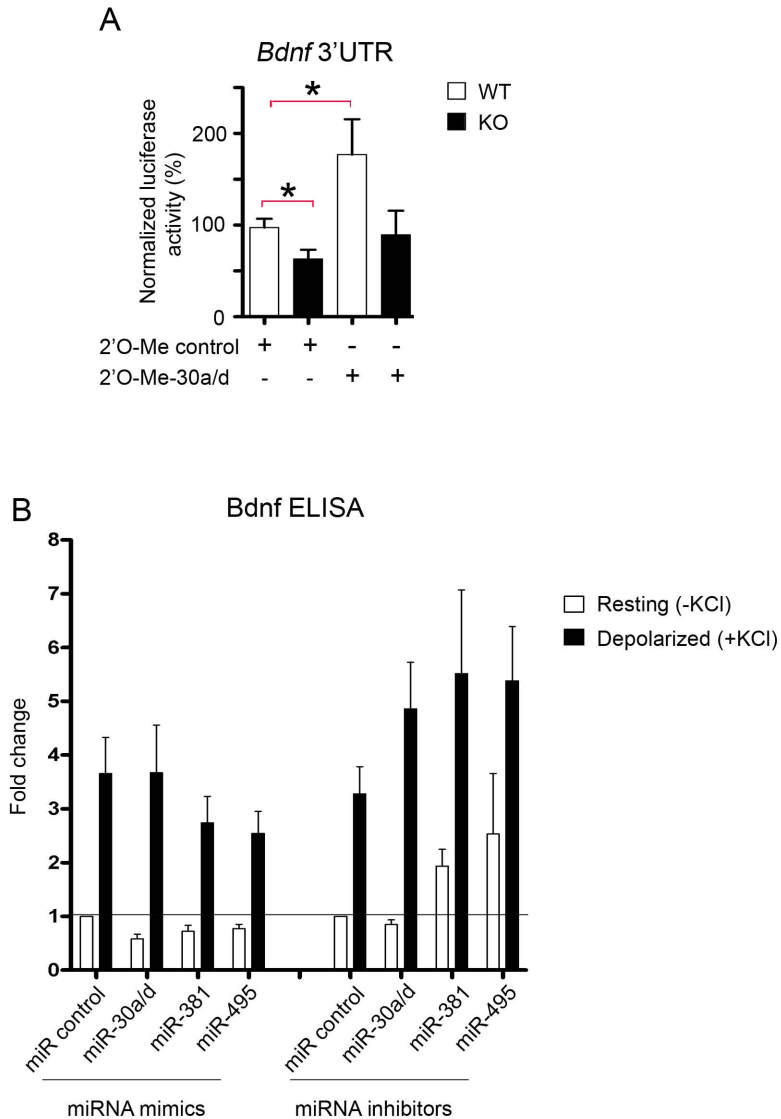

Fig. S7. Effect of dys-regulated miRNAs on the *Bdnf* 3'UTR and endogenous *Bdnf* expression level. (A) Luciferase assays in WT and KO postnatal cerebellar neurons transfected with control (100nM) or miR-30a/d (100nM) 2'O-Methyl oligonucleotide inhibitors. Error bars represents s.e.m. (\*,  $P < 0.05$ ,  $n \geq 6$ ). (B) Cultured postnatal cortical neurons (wild-type) were electroporated with miRNA mimics or inhibitors for control, miR-30a/d, miR-381 and miR-495. The *Bdnf* protein levels in both resting and depolarized neurons were determined by ELISA assays. Error bars represents s.e.m.. of four independent experiments.

A

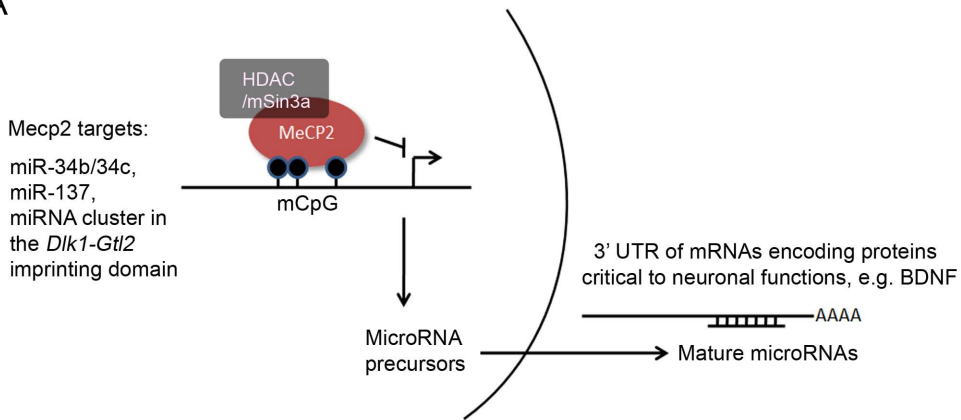

B

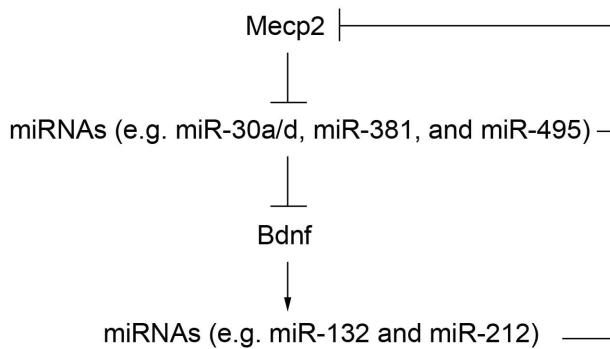

Fig. S8. Proposed models of Mecp2-dependent regulation of microRNAs (miRNAs).

(A) Mecp2 binding at DNA methylated promoters may promote transcriptional repression of a specific set of miRNAs by recruiting transcriptional co-repressor complexes (e.g. HDAC/mSin3a). In Mecp2-null brains, these miRNA targets could become aberrantly up-regulated, thereby leading to down-regulation of their targeted mRNAs (e.g. Bdnf).

(B) Mecp2 may also indirectly promote transcription of miRNAs by regulating Bdnf levels and/or neuronal activity. Note that both directly and indirectly regulated miRNAs by Mecp2 may negatively regulate Mecp2 levels through direct targeting the Mecp2 3' UTR, thereby forming a regulatory feedback loop between Mecp2 and these miRNAs.

**Table S1. Summary of SOLiD small RNA sequencing results of wild-type (WT) and *Mecp2*-null (KO) cerebella samples (postnatal 6 or 8 week old)**

| Library              | Read Length (bp) | Total number of reads | Mapping to miRBase (against miRNA precursor sequences downloaded from <a href="ftp://mirbase.org/pub/mirbase/">ftp://mirbase.org/pub/mirbase/</a> ) | Mapping to mm9 (against 23 chromosomes, no random or haplotype sequences) | Total Mappable (reads mapped to miRNAs and mm9 genome) |
|----------------------|------------------|-----------------------|-----------------------------------------------------------------------------------------------------------------------------------------------------|---------------------------------------------------------------------------|--------------------------------------------------------|
| WT (pooled, 6-wk)    | 25               | 3,660,124             | 583,466 (15.94%)                                                                                                                                    | N/A                                                                       | 583,466                                                |
| KO (pooled, 6-wk)    | 25               | 2,789,136             | 615,915 (22.08%)                                                                                                                                    | N/A                                                                       | 615,915                                                |
| WT (litter1, 8-wk)   | 50               | 33,608,586            | 1,689,951 (5.03%)                                                                                                                                   | 363,035 (1.08%)                                                           | 2,052,986                                              |
| KO#1 (litter1, 8-wk) | 50               | 34,823,537            | 2,051,745 (5.89%)                                                                                                                                   | 305,892 (0.88%)                                                           | 2,357,637                                              |
| KO#2 (litter1, 8-wk) | 50               | 34,888,098            | 2,140,833 (6.14%)                                                                                                                                   | 356,674 (1.02%)                                                           | 2,497,507                                              |
| WT (litter2, 8-wk)   | 50               | 38,433,920            | 1,604,644 (4.18%)                                                                                                                                   | 294,404 (0.77%)                                                           | 1,899,048                                              |
| KO#1 (litter2, 8-wk) | 50               | 33,039,277            | 1,463,075 (4.43%)                                                                                                                                   | 292,006 (0.88%)                                                           | 1,755,081                                              |
| KO#2 (litter2, 8-wk) | 50               | 36,680,731            | 2,327,842 (6.35%)                                                                                                                                   | 305,435 (0.83%)                                                           | 2,633,277                                              |

**Table S2. The list of mature miRNAs dys-regulated in postnatal 6-week *Mecp2*-null cerebella (pre-/early-symptomatic stages)**

Note:

1. Column 3-6 represents the genomic coordinates of aggregated reads mapped to annotated miRNA precursors.
2. Total RNA samples derived from four pairs of WT and KO littermates were pooled and sequenced together.

**Up-regulated miRNAs (6-wk, sequenced as pooled samples):**

| miRNA precursor | mature miRNA    | chr   | start     | end       | strand | WT_read# | KO_read# | log2(KO/WT) |
|-----------------|-----------------|-------|-----------|-----------|--------|----------|----------|-------------|
| mmu-mir-190     | mmu-mir-190     | chr9  | 67084504  | 67084527  | -      | 16       | 87       | 2.44        |
| mmu-mir-448     | mmu-mir-448     | chrX  | 143592825 | 143592849 | +      | 15       | 75       | 2.32        |
| mmu-mir-410     | mmu-mir-410     | chr12 | 110981975 | 110981998 | +      | 14       | 50       | 1.84        |
| mmu-mir-340     | mmu-mir-340-5p  | chr11 | 49883222  | 49883247  | +      | 91       | 322      | 1.82        |
| mmu-mir-300     | mmu-mir-300*    | chr12 | 110962529 | 110962555 | +      | 10       | 33       | 1.72        |
| mmu-mir-137     | mmu-mir-137     | chr3  | 118136820 | 118136845 | +      | 64       | 202      | 1.66        |
| mmu-mir-328     | mmu-mir-328     | chr8  | 107832274 | 107832300 | -      | 341      | 1017     | 1.58        |
| mmu-mir-1839    | mmu-mir-1839-5p | chr7  | 88674806  | 88674831  | +      | 42       | 119      | 1.50        |
| mmu-mir-1946b   | mmu-mir-1946b   | chr9  | 21417992  | 21418019  | -      | 15       | 39       | 1.38        |
| mmu-mir-29a     | mmu-mir-29a*    | chr6  | 31012706  | 31012731  | -      | 85       | 218      | 1.36        |
| mmu-mir-125b-2  | mmu-mir-125b*   | chr16 | 77646561  | 77646587  | +      | 47       | 117      | 1.32        |
| mmu-mir-26b     | mmu-mir-26b     | chr1  | 74440899  | 74440924  | +      | 548      | 1320     | 1.27        |
| mmu-mir-322     | mmu-mir-322*    | chrX  | 50407478  | 50407503  | -      | 10       | 24       | 1.26        |
| mmu-mir-369     | mmu-mir-369-3p  | chr12 | 110981676 | 110981699 | +      | 15       | 36       | 1.26        |
| mmu-mir-34b     | mmu-mir-34b-3p  | chr9  | 50911676  | 50911699  | -      | 13       | 31       | 1.25        |
| mmu-mir-7a-1    | mmu-mir-7a      | chr13 | 58494155  | 58494186  | -      | 380      | 883      | 1.22        |
| mmu-mir-543     | mmu-mir-543     | chr12 | 110955513 | 110955540 | +      | 162      | 369      | 1.19        |
| mmu-mir-24-1    | mmu-mir-24      | chr13 | 63402559  | 63402584  | +      | 7624     | 17053    | 1.16        |
| mmu-mir-24-2    | mmu-mir-24      | chr8  | 86732774  | 86732801  | +      | 7624     | 17053    | 1.16        |
| mmu-mir-320     | mmu-mir-320     | chr14 | 70843364  | 70843391  | +      | 333      | 708      | 1.09        |
| mmu-mir-874     | mmu-mir-874     | chr13 | 58124491  | 58124516  | -      | 153      | 322      | 1.07        |
| mmu-mir-1944    | mmu-mir-1944    | chr15 | 79913323  | 79913349  | -      | 31       | 65       | 1.07        |
| mmu-mir-374     | mmu-mir-374     | chrX  | 100768421 | 100768444 | -      | 13       | 27       | 1.05        |
| mmu-mir-495     | mmu-mir-495     | chr12 | 110957006 | 110957027 | +      | 450      | 929      | 1.05        |
| mmu-mir-126     | mmu-mir-126-5p  | chr2  | 26446886  | 26446911  | +      | 1709     | 3479     | 1.03        |
| mmu-mir-33      | mmu-mir-33*     | chr15 | 82028598  | 82028621  | +      | 52       | 105      | 1.01        |
| mmu-let-7i      | mmu-let-7i      | chr10 | 122422695 | 122422718 | -      | 85       | 169      | 0.99        |
| mmu-mir-150     | mmu-mir-150     | chr7  | 52377133  | 52377158  | +      | 291      | 572      | 0.97        |
| mmu-mir-744     | mmu-mir-744*    | chr11 | 65548241  | 65548264  | -      | 19       | 37       | 0.96        |
| mmu-mir-93      | mmu-mir-93*     | chr5  | 138606759 | 138606784 | -      | 33       | 64       | 0.96        |



|               |                |       |           |           |   |       |       |      |
|---------------|----------------|-------|-----------|-----------|---|-------|-------|------|
| mmu-mir-346   | mmu-mir-346    | chr14 | 35707810  | 35707836  | + | 53    | 102   | 0.94 |
| mmu-mir-326   | mmu-mir-326    | chr7  | 106700839 | 106700864 | + | 169   | 323   | 0.93 |
| mmu-mir-384   | mmu-mir-384-5p | chrX  | 102539667 | 102539692 | - | 146   | 277   | 0.92 |
| mmu-mir-434   | mmu-mir-434-3p | chr12 | 110832775 | 110832800 | + | 300   | 559   | 0.90 |
| mmu-mir-374   | mmu-mir-374*   | chrX  | 100768448 | 100768471 | - | 36    | 67    | 0.90 |
| mmu-mir-299   | mmu-mir-299    | chr12 | 110948883 | 110948910 | + | 39    | 72    | 0.88 |
| mmu-mir-331   | mmu-mir-331-3p | chr10 | 93426523  | 93426547  | - | 193   | 354   | 0.88 |
| mmu-mir-674   | mmu-mir-674    | chr2  | 117010887 | 117010913 | + | 167   | 306   | 0.87 |
| mmu-mir-9-3   | mmu-mir-9*     | chr7  | 86650204  | 86650231  | + | 590   | 1080  | 0.87 |
| mmu-mir-700   | mmu-mir-700    | chr4  | 134972471 | 134972496 | - | 116   | 212   | 0.87 |
| mmu-mir-666   | mmu-mir-666-5p | chr12 | 110955314 | 110955339 | + | 11    | 20    | 0.86 |
| mmu-mir-140   | mmu-mir-140*   | chr8  | 110075189 | 110075214 | + | 1350  | 2449  | 0.86 |
| mmu-let-7b    | mmu-let-7b*    | chr15 | 85537805  | 85537833  | + | 21    | 38    | 0.86 |
| mmu-mir-497   | mmu-mir-497    | chr11 | 70048233  | 70048259  | + | 709   | 1279  | 0.85 |
| mmu-mir-188   | mmu-mir-188-5p | chrX  | 6825152   | 6825176   | - | 40    | 72    | 0.85 |
| mmu-mir-28    | mmu-mir-28     | chr16 | 24827955  | 24827979  | + | 19    | 34    | 0.84 |
| mmu-mir-124-3 | mmu-mir-124    | chr2  | 180628787 | 180628813 | + | 41767 | 74427 | 0.83 |
| mmu-mir-124-2 | mmu-mir-124    | chr3  | 17695722  | 17695750  | + | 41771 | 74429 | 0.83 |
| mmu-let-7e    | mmu-let-7e     | chr17 | 17967331  | 17967356  | + | 594   | 1058  | 0.83 |
| mmu-mir-9-1   | mmu-mir-9*     | chr3  | 88019572  | 88019601  | + | 617   | 1091  | 0.82 |
| mmu-mir-9-2   | mmu-mir-9*     | chr13 | 83878461  | 83878490  | + | 617   | 1091  | 0.82 |
| mmu-mir-124-1 | mmu-mir-124    | chr14 | 65209545  | 65209573  | + | 42280 | 74760 | 0.82 |
| mmu-mir-873   | mmu-mir-873    | chr4  | 36615584  | 36615609  | - | 25    | 44    | 0.82 |
| mmu-mir-136   | mmu-mir-136*   | chr12 | 110833576 | 110833599 | + | 302   | 525   | 0.80 |
| mmu-mir-381   | mmu-mir-381    | chr12 | 110965080 | 110965106 | + | 489   | 841   | 0.78 |
| mmu-mir-455   | mmu-mir-455    | chr4  | 62917938  | 62917965  | + | 74    | 127   | 0.78 |
| mmu-mir-323   | mmu-mir-323-3p | chr12 | 110950768 | 110950792 | + | 123   | 210   | 0.77 |
| mmu-mir-484   | mmu-mir-484    | chr16 | 14159724  | 14159749  | + | 1060  | 1806  | 0.77 |
| mmu-mir-3470a | mmu-mir-3470a  | chr6  | 83040345  | 83040375  | - | 30    | 51    | 0.77 |
| mmu-mir-206   | mmu-mir-206    | chr1  | 20669137  | 20669162  | + | 149   | 250   | 0.75 |
| mmu-mir-362   | mmu-mir-362-5p | chrX  | 6819142   | 6819167   | - | 52    | 87    | 0.74 |
| mmu-mir-15a   | mmu-mir-15a*   | chr14 | 62250872  | 62250895  | - | 18    | 30    | 0.74 |
| mmu-mir-203   | mmu-mir-203    | chr12 | 113369139 | 113369163 | + | 33    | 55    | 0.74 |
| mmu-mir-350   | mmu-mir-350    | chr1  | 178702468 | 178702493 | - | 54    | 89    | 0.72 |
| mmu-mir-154   | mmu-mir-154*   | chr12 | 110976685 | 110976709 | + | 82    | 135   | 0.72 |
| mmu-mir-217   | mmu-mir-217    | chr11 | 28663761  | 28663786  | + | 14    | 23    | 0.72 |
| mmu-mir-666   | mmu-mir-666-3p | chr12 | 110955351 | 110955377 | + | 752   | 1229  | 0.71 |
| mmu-mir-149   | mmu-mir-149    | chr1  | 94746959  | 94746983  | + | 169   | 275   | 0.70 |

|              |                |       |           |           |   |      |      |      |
|--------------|----------------|-------|-----------|-----------|---|------|------|------|
| mmu-let-7f-1 | mmu-let-7f     | chr13 | 48633253  | 48633278  | - | 1041 | 1686 | 0.70 |
| mmu-let-7f-2 | mmu-let-7f     | chrX  | 148346897 | 148346922 | + | 1091 | 1757 | 0.69 |
| mmu-mir-544  | mmu-mir-544    | chr12 | 110967582 | 110967606 | + | 82   | 132  | 0.69 |
| mmu-mir-30a  | mmu-mir-30a    | chr1  | 23279114  | 23279140  | + | 2836 | 4546 | 0.68 |
| mmu-mir-34c  | mmu-mir-34c*   | chr9  | 50911145  | 50911169  | - | 22   | 35   | 0.67 |
| mmu-mir-146a | mmu-mir-146a   | chr11 | 43187932  | 43187957  | - | 24   | 38   | 0.66 |
| mmu-let-7a-2 | mmu-let-7a     | chr9  | 41344815  | 41344841  | + | 4477 | 7024 | 0.65 |
| mmu-mir-382  | mmu-mir-382    | chr12 | 110971992 | 110972018 | + | 679  | 1063 | 0.65 |
| mmu-mir-296  | mmu-mir-296-5p | chr2  | 174092592 | 174092613 | - | 23   | 36   | 0.65 |
| mmu-mir-423  | mmu-mir-423-5p | chr11 | 76891621  | 76891645  | - | 16   | 25   | 0.64 |
| mmu-mir-872  | mmu-mir-872    | chr4  | 94331859  | 94331884  | + | 75   | 117  | 0.64 |
| mmu-mir-30d  | mmu-mir-30d    | chr15 | 68172813  | 68172839  | - | 3493 | 5433 | 0.64 |
| mmu-mir-181d | mmu-mir-181d   | chr8  | 86702654  | 86702679  | - | 1036 | 1605 | 0.63 |
| mmu-mir-143  | mmu-mir-143    | chr18 | 61808849  | 61808873  | - | 743  | 1151 | 0.63 |
| mmu-mir-106a | mmu-mir-106a   | chrX  | 50095714  | 50095739  | - | 138  | 213  | 0.63 |
| mmu-let-7a-1 | mmu-let-7a     | chr13 | 48633582  | 48633628  | - | 4717 | 7278 | 0.63 |
| mmu-mir-377  | mmu-mir-377    | chr12 | 110978761 | 110978786 | + | 26   | 40   | 0.62 |
| mmu-mir-20a  | mmu-mir-20a    | chr14 | 115443406 | 115443430 | + | 54   | 83   | 0.62 |
| mmu-mir-106b | mmu-mir-106b   | chr5  | 138607009 | 138607034 | - | 142  | 218  | 0.62 |
| mmu-mir-380  | mmu-mir-380-3p | chr12 | 110950053 | 110950074 | + | 38   | 58   | 0.61 |
| mmu-mir-341  | mmu-mir-341    | chr12 | 110849766 | 110849794 | + | 210  | 320  | 0.61 |
| mmu-mir-299  | mmu-mir-299*   | chr12 | 110948851 | 110948880 | + | 46   | 70   | 0.61 |
| mmu-mir-690  | mmu-mir-690    | chr16 | 28600020  | 28600070  | - | 23   | 35   | 0.61 |
| mmu-let-7b   | mmu-let-7b     | chr15 | 85537756  | 85537801  | + | 5628 | 8535 | 0.60 |

**Down-regulated miRNAs (6-wk, sequenced as pooled samples):**

| miRNA precursor | mature miRNA   | chr  | start     | end       | strand | WT_read# | KO_read# | log2(KO/WT) |
|-----------------|----------------|------|-----------|-----------|--------|----------|----------|-------------|
| mmu-mir-290     | mmu-mir-290-5p | chr7 | 3218641   | 3218663   | +      | 15       | 2        | -2.91       |
| mmu-mir-26b     | mmu-mir-26b*   | chr1 | 74440935  | 74440955  | +      | 10       | 2        | -2.32       |
| mmu-mir-302c    | mmu-mir-302c   | chr3 | 127248325 | 127248347 | +      | 35       | 8        | -2.13       |
| mmu-mir-222     | mmu-mir-222    | chrX | 18724023  | 18724050  | -      | 672      | 185      | -1.86       |
| mmu-mir-302a    | mmu-mir-302a   | chr3 | 127248458 | 127248482 | +      | 91       | 28       | -1.70       |
| mmu-mir-488     | mmu-mir-488    | chr1 | 160435821 | 160435843 | +      | 16       | 5        | -1.68       |
| mmu-mir-671     | mmu-mir-671-5p | chr5 | 24097951  | 24097976  | +      | 55       | 18       | -1.61       |
| mmu-mir-676     | mmu-mir-676*   | chrX | 97576454  | 97576476  | +      | 13       | 5        | -1.38       |
| mmu-mir-16-2    | mmu-mir-16     | chr3 | 68813841  | 68813866  | +      | 3378     | 1319     | -1.36       |
| mmu-mir-92a-2   | mmu-mir-92a    | chrX | 50095028  | 50095050  | -      | 56       | 22       | -1.35       |

|                |                 |       |           |           |   |       |       |       |
|----------------|-----------------|-------|-----------|-----------|---|-------|-------|-------|
| mmu-mir-16-1   | mmu-mir-16      | chr14 | 62250768  | 62250794  | - | 3454  | 1362  | -1.34 |
| mmu-mir-144    | mmu-mir-144     | chr11 | 77886550  | 77886573  | + | 20    | 8     | -1.32 |
| mmu-mir-214    | mmu-mir-214     | chr1  | 164153569 | 164153593 | + | 30    | 12    | -1.32 |
| mmu-mir-330    | mmu-mir-330     | chr7  | 19766836  | 19766860  | + | 39    | 16    | -1.29 |
| mmu-mir-302d   | mmu-mir-302d    | chr3  | 127248584 | 127248608 | + | 153   | 63    | -1.28 |
| mmu-mir-22     | mmu-mir-22*     | chr11 | 75277237  | 75277261  | + | 308   | 129   | -1.26 |
| mmu-mir-652    | mmu-mir-652     | chrX  | 139173604 | 139173628 | + | 94    | 40    | -1.23 |
| mmu-mir-221    | mmu-mir-221     | chrX  | 18723429  | 18723454  | - | 851   | 373   | -1.19 |
| mmu-mir-770    | mmu-mir-770-5p  | chr12 | 110801921 | 110801944 | + | 22    | 10    | -1.14 |
| mmu-mir-302b   | mmu-mir-302b    | chr3  | 127248194 | 127248218 | + | 120   | 55    | -1.13 |
| mmu-mir-92a-1  | mmu-mir-92a     | chr14 | 115443699 | 115443723 | + | 65    | 30    | -1.12 |
| mmu-mir-10b    | mmu-mir-10b     | chr2  | 74564132  | 74564155  | + | 33    | 17    | -0.96 |
| mmu-mir-132    | mmu-mir-132     | chr11 | 74987226  | 74987250  | + | 1449  | 757   | -0.94 |
| mmu-mir-324    | mmu-mir-324-3p  | chr11 | 69825598  | 69825625  | + | 53    | 28    | -0.92 |
| mmu-mir-20b    | mmu-mir-20b     | chrX  | 50095333  | 50095357  | - | 62    | 33    | -0.91 |
| mmu-mir-431    | mmu-mir-431     | chr12 | 110828670 | 110828695 | + | 48    | 26    | -0.88 |
| mmu-mir-151    | mmu-mir-151-3p  | chr15 | 73085244  | 73085269  | - | 59    | 32    | -0.88 |
| mmu-mir-466j   | mmu-mir-466j    | chr10 | 60423529  | 60423573  | + | 31    | 17    | -0.87 |
| mmu-mir-25     | mmu-mir-25      | chr5  | 138606556 | 138606580 | - | 203   | 113   | -0.85 |
| mmu-mir-212    | mmu-mir-212     | chr11 | 74986945  | 74986971  | + | 69    | 40    | -0.79 |
| mmu-mir-140    | mmu-mir-140     | chr8  | 110075150 | 110075174 | + | 372   | 221   | -0.75 |
| mmu-mir-15b    | mmu-mir-15b     | chr3  | 68813698  | 68813722  | + | 138   | 82    | -0.75 |
| mmu-mir-709    | mmu-mir-709     | chr8  | 86610058  | 86610086  | + | 37    | 22    | -0.75 |
| mmu-mir-28     | mmu-mir-28*     | chr16 | 24827995  | 24828017  | + | 10    | 6     | -0.74 |
| mmu-mir-148a   | mmu-mir-148a    | chr6  | 51219824  | 51219848  | - | 71    | 43    | -0.72 |
| mmu-mir-574    | mmu-mir-574-3p  | chr5  | 65361604  | 65361629  | + | 75    | 46    | -0.71 |
| mmu-mir-1959   | mmu-mir-1959    | chr5  | 119975652 | 119975676 | - | 13    | 8     | -0.70 |
| mmu-mir-199b   | mmu-mir-199b*   | chr2  | 32174006  | 32174031  | + | 359   | 222   | -0.69 |
| mmu-mir-142    | mmu-mir-142-3p  | chr11 | 87570406  | 87570430  | + | 16    | 10    | -0.68 |
| mmu-mir-466f-4 | mmu-mir-466f    | chr13 | 71245988  | 71246015  | + | 24    | 15    | -0.68 |
| mmu-mir-466d   | mmu-mir-466d-3p | chr2  | 10433644  | 10433689  | + | 11    | 7     | -0.65 |
| mmu-mir-29c    | mmu-mir-29c     | chr1  | 196863794 | 196863821 | + | 95636 | 63680 | -0.59 |
| mmu-let-7a-1   | mmu-let-7a*     | chr13 | 48633552  | 48633577  | - | 261   | 174   | -0.58 |
| mmu-mir-297a-5 | mmu-mir-297a    | chr2  | 10393893  | 10393920  | + | 18    | 12    | -0.58 |
| mmu-mir-676    | mmu-mir-676     | chrX  | 97576491  | 97576514  | + | 24    | 16    | -0.58 |

**Table S3. The list of mature miRNAs dys-regulated in postnatal 8-week *Mecp2*-null cerebella (at symptomatic stages)**

Note:

1. Column 3-6 represents the genomic coordinates of aggregated reads mapped to annotated miRNA precursors.
2. Column 7-12 represents normalized read count (read per million reads) for each mature miRNA of the indicated sample. A total of six small RNA samples were derived from two litters (#1 and #2, one WT and two KO in each litter) and sequenced individually.
3. Column 13 represents the mean of four log2 ratios of (read count in each KO/ averaged read count in WT of litter #1 and #2)

**Up-regulated miRNAs (8-wk, sequenced as individual samples):**

| miRNA precursor | mature miRNA    | chr   | start     | end       | strand | WT#1  | KO#1_1 | KO#1_2 | WT#2  | KO#2_1 | KO#2_2 | log2(KO/WT) |
|-----------------|-----------------|-------|-----------|-----------|--------|-------|--------|--------|-------|--------|--------|-------------|
| mmu-mir-99b     | mmu-mir-99b     | chr17 | 17967159  | 17967180  | +      | 4     | 125    | 17     | 4     | 3      | 6      | 3.22        |
| mmu-mir-206     | mmu-mir-206     | chr1  | 20669137  | 20669158  | +      | 1     | 6      | 3      | 2     | 14     | 4      | 2.19        |
| mmu-mir-34c     | mmu-mir-34c     | chr9  | 50911177  | 50911204  | -      | 12    | 93     | 274    | 102   | 380    | 109    | 1.90        |
| mmu-mir-379     | mmu-mir-379     | chr12 | 110947276 | 110947296 | +      | 1     | 3      | 3      | 1     | 6      | 4      | 1.89        |
| mmu-mir-299     | mmu-mir-299*    | chr12 | 110948855 | 110948876 | +      | 1     | 1      | 6      | 1     | 3      | 7      | 1.72        |
| mmu-mir-874     | mmu-mir-874     | chr13 | 58124495  | 58124518  | -      | 15    | 84     | 118    | 53    | 152    | 57     | 1.60        |
| mmu-mir-30b     | mmu-mir-30b*    | chr15 | 68168993  | 68169015  | -      | 2     | 3      | 8      | 2     | 8      | 4      | 1.51        |
| mmu-mir-101a    | mmu-mir-101a    | chr4  | 101019558 | 101019584 | -      | 43    | 31     | 210    | 73    | 161    | 214    | 1.42        |
| mmu-mir-674     | mmu-mir-674     | chr2  | 117010887 | 117010910 | +      | 18    | 25     | 90     | 37    | 86     | 89     | 1.42        |
| mmu-mir-103-1   | mmu-mir-103     | chr11 | 35595946  | 35595978  | +      | 10396 | 31995  | 58085  | 39819 | 110117 | 62482  | 1.39        |
| mmu-mir-103-2   | mmu-mir-103     | chr2  | 131113836 | 131113870 | +      | 10442 | 32110  | 58306  | 39932 | 110293 | 62658  | 1.39        |
| mmu-mir-672     | mmu-mir-672     | chrX  | 101311568 | 101311590 | -      | 1     | 10     | 6      | 10    | 31     | 10     | 1.34        |
| mmu-mir-532     | mmu-mir-532-5p  | chrX  | 6825582   | 6825605   | -      | 31    | 64     | 135    | 162   | 497    | 257    | 1.30        |
| mmu-mir-455     | mmu-mir-455     | chr4  | 62917937  | 62917959  | +      | 2     | 5      | 5      | 4     | 8      | 8      | 1.27        |
| mmu-mir-30e     | mmu-mir-30e*    | chr4  | 120445223 | 120445245 | -      | 1     | 2      | 1      | 1     | 3      | 3      | 1.25        |
| mmu-mir-210     | mmu-mir-210     | chr7  | 148407307 | 148407328 | -      | 1     | 1      | 3      | 2     | 3      | 6      | 1.22        |
| mmu-mir-199a-1  | mmu-mir-199a-5p | chr9  | 21300978  | 21301004  | -      | 25    | 14     | 100    | 30    | 70     | 66     | 1.19        |
| mmu-mir-199a-2  | mmu-mir-199a-5p | chr1  | 164147976 | 164148002 | +      | 25    | 14     | 101    | 31    | 71     | 66     | 1.17        |
| mmu-mir-29b-1   | mmu-mir-29b*    | chr6  | 31013065  | 31013089  | -      | 14    | 35     | 24     | 31    | 69     | 63     | 1.10        |
| mmu-mir-16-1    | mmu-mir-16      | chr14 | 62250772  | 62250795  | -      | 31    | 27     | 76     | 44    | 64     | 150    | 1.09        |
| mmu-mir-199b    | mmu-mir-199b*   | chr2  | 32174006  | 32174030  | +      | 170   | 227    | 781    | 362   | 705    | 507    | 1.06        |
| mmu-mir-127     | mmu-mir-127*    | chr12 | 110831064 | 110831092 | +      | 81    | 74     | 203    | 101   | 204    | 267    | 1.04        |
| mmu-mir-665     | mmu-mir-665     | chr12 | 110824579 | 110824601 | +      | 3     | 7      | 9      | 9     | 17     | 17     | 1.03        |
| mmu-mir-543     | mmu-mir-543     | chr12 | 110955513 | 110955539 | +      | 38    | 455    | 542    | 474   | 581    | 513    | 1.03        |
| mmu-mir-137     | mmu-mir-137     | chr3  | 118136820 | 118136843 | +      | 149   | 266    | 328    | 122   | 217    | 285    | 1.01        |
| mmu-mir-34a     | mmu-mir-34a     | chr4  | 149442581 | 149442611 | +      | 922   | 2219   | 2816   | 2600  | 3436   | 5645   | 1.00        |
| mmu-mir-146b    | mmu-mir-146b    | chr19 | 46417281  | 46417304  | +      | 14    | 14     | 26     | 22    | 53     | 48     | 0.96        |
| mmu-mir-377     | mmu-mir-377     | chr12 | 110978761 | 110978785 | +      | 19    | 50     | 72     | 39    | 45     | 60     | 0.95        |
| mmu-mir-7a-1    | mmu-mir-7a*     | chr13 | 58494161  | 58494186  | -      | 231   | 1595   | 1407   | 1079  | 1134   | 899    | 0.94        |

|                |                 |       |           |           |   |      |      |      |      |       |       |      |
|----------------|-----------------|-------|-----------|-----------|---|------|------|------|------|-------|-------|------|
| mmu-mir-16-2   | mmu-mir-16      | chr3  | 68813841  | 68813863  | + | 27   | 16   | 51   | 37   | 56    | 123   | 0.94 |
| mmu-mir-15a    | mmu-mir-15a     | chr14 | 62250908  | 62250934  | - | 27   | 97   | 105  | 56   | 59    | 54    | 0.94 |
| mmu-mir-27a    | mmu-mir-27a     | chr8  | 86732627  | 86732651  | + | 2    | 4    | 6    | 2    | 2     | 3     | 0.89 |
| mmu-mir-744    | mmu-mir-744*    | chr11 | 65548245  | 65548266  | - | 2    | 8    | 7    | 6    | 3     | 12    | 0.89 |
| mmu-mir-495    | mmu-mir-495     | chr12 | 110957006 | 110957028 | + | 6    | 31   | 49   | 41   | 49    | 43    | 0.86 |
| mmu-mir-708    | mmu-mir-708*    | chr7  | 103398007 | 103398029 | + | 3    | 8    | 12   | 9    | 11    | 10    | 0.80 |
| mmu-mir-19b-1  | mmu-mir-19b     | chr14 | 115443580 | 115443605 | + | 334  | 614  | 1001 | 491  | 568   | 668   | 0.79 |
| mmu-mir-34b    | mmu-mir-34b-3p  | chr9  | 50911679  | 50911701  | - | 4    | 2    | 9    | 4    | 8     | 7     | 0.78 |
| mmu-mir-19b-2  | mmu-mir-19b     | chrX  | 50095168  | 50095192  | - | 348  | 624  | 1012 | 498  | 575   | 681   | 0.77 |
| mmu-mir-1839   | mmu-mir-1839-3p | chr7  | 88674845  | 88674869  | + | 5    | 14   | 16   | 31   | 53    | 38    | 0.75 |
| mmu-mir-181b-2 | mmu-mir-181b    | chr2  | 38709365  | 38709394  | + | 1674 | 3379 | 2840 | 2869 | 4429  | 4578  | 0.74 |
| mmu-mir-211    | mmu-mir-211     | chr7  | 71350718  | 71350740  | + | 3    | 5    | 5    | 2    | 1     | 7     | 0.73 |
| mmu-mir-338    | mmu-mir-338-5p  | chr11 | 119876130 | 119876154 | - | 41   | 117  | 89   | 115  | 178   | 129   | 0.72 |
| mmu-mir-19a    | mmu-mir-19a     | chr14 | 115443271 | 115443294 | + | 85   | 120  | 218  | 80   | 89    | 113   | 0.71 |
| mmu-mir-340    | mmu-mir-340-3p  | chr11 | 49883264  | 49883293  | + | 61   | 634  | 1139 | 1780 | 3418  | 789   | 0.70 |
| mmu-mir-181b-1 | mmu-mir-181b    | chr1  | 139863227 | 139863256 | + | 1511 | 2804 | 2254 | 2482 | 3943  | 3928  | 0.70 |
| mmu-mir-24-2   | mmu-mir-24-2*   | chr8  | 86732739  | 86732761  | + | 4    | 13   | 14   | 11   | 13    | 11    | 0.69 |
| mmu-mir-488    | mmu-mir-488*    | chr1  | 160435783 | 160435805 | + | 2    | 2    | 8    | 4    | 5     | 4     | 0.69 |
| mmu-mir-15a    | mmu-mir-15a*    | chr14 | 62250874  | 62250912  | - | 24   | 48   | 51   | 47   | 60    | 69    | 0.68 |
| mmu-mir-199a-1 | mmu-mir-199a-3p | chr9  | 21300943  | 21300965  | - | 16   | 23   | 36   | 16   | 26    | 18    | 0.67 |
| mmu-mir-199a-2 | mmu-mir-199a-3p | chr1  | 164148014 | 164148036 | + | 16   | 23   | 36   | 16   | 26    | 18    | 0.67 |
| mmu-mir-199b   | mmu-mir-199b    | chr2  | 32174044  | 32174066  | + | 16   | 23   | 36   | 16   | 26    | 18    | 0.67 |
| mmu-mir-666    | mmu-mir-666-5p  | chr12 | 110955314 | 110955341 | + | 9    | 15   | 22   | 23   | 34    | 29    | 0.66 |
| mmu-mir-29a    | mmu-mir-29a*    | chr6  | 31012708  | 31012733  | - | 84   | 101  | 169  | 104  | 184   | 137   | 0.65 |
| mmu-mir-382    | mmu-mir-382*    | chr12 | 110972026 | 110972050 | + | 14   | 34   | 32   | 28   | 28    | 37    | 0.64 |
| mmu-let-7e     | mmu-let-7e      | chr17 | 17967331  | 17967354  | + | 131  | 181  | 180  | 340  | 547   | 558   | 0.64 |
| mmu-mir-434    | mmu-mir-434-5p  | chr12 | 110832738 | 110832760 | + | 18   | 61   | 53   | 73   | 108   | 62    | 0.63 |
| mmu-mir-425    | mmu-mir-425*    | chr9  | 108471162 | 108471186 | + | 7    | 13   | 3    | 4    | 8     | 10    | 0.63 |
| mmu-mir-107    | mmu-mir-107     | chr19 | 34895186  | 34895227  | - | 4727 | 6968 | 9436 | 9401 | 15867 | 10939 | 0.61 |

**Down-regulated miRNAs (8-wk, sequenced as individual samples):**

| miRNA precursor | mature miRNA    | chr   | start     | end       | strand | WT#1  | KO#1_1 | KO#1_2 | WT#2  | KO#2_1 | KO#2_2 | log2(KO/WT) |
|-----------------|-----------------|-------|-----------|-----------|--------|-------|--------|--------|-------|--------|--------|-------------|
| mmu-mir-331     | mmu-mir-331-3p  | chr10 | 93426528  | 93426549  | -      | 25    | 7      | 1      | 7     | 2      | 8      | -1.82       |
| mmu-mir-10a     | mmu-mir-10a     | chr11 | 96178501  | 96178522  | +      | 9     | 1      | 3      | 2     | 2      | 1      | -1.70       |
| mmu-mir-365-2   | mmu-mir-365     | chr11 | 79539970  | 79539992  | +      | 88    | 26     | 17     | 29    | 17     | 24     | -1.48       |
| mmu-mir-365-1   | mmu-mir-365     | chr16 | 13453989  | 13454011  | +      | 88    | 27     | 17     | 29    | 17     | 24     | -1.46       |
| mmu-mir-326     | mmu-mir-326     | chr7  | 106700839 | 106700863 | +      | 163   | 38     | 18     | 84    | 72     | 63     | -1.37       |
| mmu-mir-143     | mmu-mir-143     | chr18 | 61808853  | 61808875  | -      | 26    | 9      | 7      | 7     | 8      | 6      | -1.19       |
| mmu-mir-378     | mmu-mir-378*    | chr18 | 61557527  | 61557551  | -      | 103   | 38     | 16     | 43    | 30     | 48     | -1.15       |
| mmu-mir-382     | mmu-mir-382     | chr12 | 110971992 | 110972018 | +      | 196   | 70     | 32     | 86    | 62     | 93     | -1.14       |
| mmu-let-7f-1    | mmu-let-7f      | chr13 | 48633250  | 48633280  | -      | 10694 | 3449   | 5392   | 3603  | 1      | 5530   | -0.99       |
| mmu-mir-361     | mmu-mir-361     | chrX  | 110188472 | 110188498 | -      | 955   | 420    | 170    | 460   | 243    | 607    | -0.97       |
| mmu-mir-329     | mmu-mir-329     | chr12 | 110951752 | 110951775 | +      | 123   | 45     | 47     | 57    | 36     | 57     | -0.96       |
| mmu-mir-140     | mmu-mir-140     | chr8  | 110075149 | 110075174 | +      | 68    | 28     | 28     | 56    | 34     | 37     | -0.96       |
| mmu-mir-340     | mmu-mir-340-5p  | chr11 | 49883222  | 49883244  | +      | 136   | 67     | 41     | 57    | 17     | 76     | -0.94       |
| mmu-let-7a-1    | mmu-let-7a*     | chr13 | 48633555  | 48633579  | -      | 24    | 11     | 10     | 12    | 7      | 10     | -0.92       |
| mmu-let-7c-2    | mmu-let-7c-2*   | chr15 | 85537095  | 85537117  | +      | 23    | 11     | 10     | 12    | 7      | 11     | -0.83       |
| mmu-mir-328     | mmu-mir-328     | chr8  | 107832277 | 107832302 | -      | 128   | 91     | 38     | 216   | 131    | 138    | -0.79       |
| mmu-mir-193b    | mmu-mir-193b    | chr16 | 13449664  | 13449688  | +      | 23    | 19     | 15     | 45    | 19     | 25     | -0.78       |
| mmu-mir-708     | mmu-mir-708     | chr7  | 103397961 | 103397987 | +      | 127   | 85     | 63     | 148   | 95     | 87     | -0.73       |
| mmu-mir-125a    | mmu-mir-125a-5p | chr17 | 17967782  | 17967814  | +      | 27614 | 18887  | 12841  | 27130 | 20355  | 15513  | -0.70       |
| mmu-mir-98      | mmu-mir-98      | chrX  | 148347773 | 148347796 | +      | 202   | 109    | 115    | 146   | 86     | 131    | -0.66       |
| mmu-mir-29c     | mmu-mir-29c     | chr1  | 196863781 | 196863822 | +      | 1717  | 1866   | 923    | 1367  | 659    | 546    | -0.63       |

**Table S4. The list of other non-coding small RNAs (ncRNAs) dys-regulated in postnatal 6-week *Mecp2*-null cerebella**

| ncRNA_name            | WT_read# (rpm) | KO_read# (rpm) | Log2(KO/WT) |
|-----------------------|----------------|----------------|-------------|
| chr5.trna1609-AspGTC  | 443            | 1695           | 1.94        |
| SNORD45               | 745            | 2350           | 1.66        |
| chr3.trna293-HisGTG   | 2174           | 6265           | 1.53        |
| chr13.trna1041-LysCTT | 523            | 1474           | 1.49        |
| chr8.trna886-GlyGCC   | 1892           | 5012           | 1.41        |
| chr10.trna856-AspGTC  | 25283          | 63016          | 1.32        |
| chr13.trna113-GlnTTG  | 684            | 1695           | 1.31        |
| chr6.trna157-CysGCA   | 12400          | 28597          | 1.21        |
| chr11.trna1432-CysGCA | 11554          | 26386          | 1.19        |
| chr11.trna1433-CysGCA | 11554          | 26386          | 1.19        |
| chr9.trna593-CysGCA   | 11554          | 26386          | 1.19        |
| chr11.trna791-CysGCA  | 11554          | 26386          | 1.19        |
| chr11.trna1442-CysGCA | 12078          | 27565          | 1.19        |
| chr17.trna458-CysGCA  | 12078          | 27565          | 1.19        |
| chr13.trna69-AlaAGC   | 8052           | 18278          | 1.18        |
| chr11.trna1823-IleAAT | 1369           | 3096           | 1.18        |
| chr13.trna956-IleAAT  | 1369           | 3096           | 1.18        |
| chr13.trna968-IleAAT  | 1369           | 3096           | 1.18        |
| chr13.trna989-IleAAT  | 1369           | 3096           | 1.18        |
| chr13.trna990-IleAAT  | 1369           | 3096           | 1.18        |
| chr6.trna162-CysGCA   | 684            | 1548           | 1.18        |
| chr13.trna100-IleAAT  | 1369           | 3096           | 1.18        |
| chr11.trna393-IleAAT  | 1369           | 3096           | 1.18        |
| chr12.trna470-IleAAT  | 1369           | 3096           | 1.18        |
| chr13.trna92-IleAAT   | 1369           | 3096           | 1.18        |
| chr13.trna68-AlaTGC   | 8092           | 18278          | 1.18        |
| chr13.trna66-AlaAGC   | 7971           | 17836          | 1.16        |
| SNORD57               | 1824           | 4060           | 1.15        |
| snoU97                | 122            | 270            | 1.14        |
| chr13.trna988-PheGAA  | 403            | 884            | 1.14        |
| chr11.trna1444-CysGCA | 3140           | 6412           | 1.03        |
| chr6.trna175-CysGCA   | 3301           | 6707           | 1.02        |
| chr19.trna108-PheGAA  | 443            | 884            | 1.00        |
| chr10.trna961-PheGAA  | 483            | 958            | 0.99        |
| chr14.trna457-PheGAA  | 483            | 958            | 0.99        |

|                       |       |       |       |
|-----------------------|-------|-------|-------|
| chr5.trna1315-PheGAA  | 483   | 958   | 0.99  |
| chr13.trna60-PheGAA   | 483   | 958   | 0.99  |
| chr19.trna106-PheGAA  | 483   | 958   | 0.99  |
| chr7.trna967-GluCTC   | 1530  | 2948  | 0.95  |
| chr11.trna550-ThrCGT  | 805   | 1548  | 0.94  |
| chr6.trna1005-CysGCA  | 2738  | 5233  | 0.93  |
| SNORD38               | 178   | 337   | 0.92  |
| chr10.trna1316-LeuTAA | 2214  | 4127  | 0.90  |
| SNORD127              | 189   | 337   | 0.84  |
| SNORD22               | 334   | 585   | 0.81  |
| SNORD60               | 2681  | 4656  | 0.80  |
| SNORD91               | 3849  | 6477  | 0.75  |
| chr15.trna913-MetCAT  | 1932  | 3243  | 0.75  |
| chr8.trna783-MetCAT   | 1932  | 3243  | 0.75  |
| chr6.trna1023-CysGCA  | 443   | 737   | 0.73  |
| chr11.trna1493-GlnTTG | 2174  | 3611  | 0.73  |
| chr3.trna753-GlnCTG   | 2416  | 3906  | 0.69  |
| SNORD44               | 701   | 1113  | 0.67  |
| chr3.trna756-GlnCTG   | 2577  | 4054  | 0.65  |
| chr11.trna1817-GlnCTG | 2577  | 4054  | 0.65  |
| chr3.trna297-GlnCTG   | 2577  | 4054  | 0.65  |
| chr13.trna64-GlnCTG   | 2577  | 4054  | 0.65  |
| chr9.trna961-GluTTC   | 8374  | 13119 | 0.65  |
| chr13.trna105-GluTTC  | 8374  | 13119 | 0.65  |
| chr14.trna347-GluTTC  | 8374  | 13119 | 0.65  |
| chr7.trna337-GluTTC   | 8374  | 13119 | 0.65  |
| chr13.trna982-GlnCTG  | 2496  | 3906  | 0.65  |
| chr9.trna342-GlnCTG   | 2496  | 3906  | 0.65  |
| chr1.trna1547-GluTTC  | 8414  | 12824 | 0.61  |
| chr14.trna359-GluTTC  | 8414  | 12824 | 0.61  |
| chrX.trna637-AlaTGC   | 3825  | 5823  | 0.61  |
| SNORD115              | 43136 | 65639 | 0.61  |
| chr13.trna979-AspGTC  | 49760 | 75472 | 0.60  |
| chr15.trna355-MetCAT  | 684   | 1032  | 0.59  |
| chr3.trna309-GlnCTG   | 2456  | 3685  | 0.59  |
| chr11.trna2022-AlaTGC | 1329  | 1990  | 0.58  |
| chr3.trna754-GluTTC   | 1208  | 811   | -0.58 |
| chr3.trna750-AsnGTT   | 2093  | 1400  | -0.58 |



|                       |        |       |       |
|-----------------------|--------|-------|-------|
| chr11.trna1911-LeuCAA | 3865   | 2580  | -0.58 |
| snR78                 | 979    | 652   | -0.59 |
| chr13.trna998-LeuCAA  | 3865   | 2506  | -0.63 |
| chr13.trna65-LeuCAA   | 3865   | 2506  | -0.63 |
| chr13.trna85-LeuCAA   | 3865   | 2506  | -0.63 |
| snoU6-77              | 278    | 180   | -0.63 |
| chr8.trna168-LeuCAG   | 3664   | 2358  | -0.64 |
| SNORD52               | 512    | 326   | -0.65 |
| SNORD110              | 1190   | 753   | -0.66 |
| RSV_RNA               | 6852   | 4318  | -0.67 |
| snoR38                | 1824   | 1147  | -0.67 |
| SNORD88               | 2770   | 1732  | -0.68 |
| SNORD75               | 7775   | 4847  | -0.68 |
| SNORD90               | 434    | 270   | -0.68 |
| SCARNA4               | 5517   | 3430  | -0.69 |
| SNORD24               | 1224   | 742   | -0.72 |
| SNORD113              | 53170  | 30925 | -0.78 |
| SNORD101              | 679    | 394   | -0.79 |
| SNORD103              | 5873   | 3351  | -0.81 |
| U2                    | 1513   | 843   | -0.84 |
| SNORD111              | 222    | 124   | -0.85 |
| SNORD71               | 790    | 427   | -0.89 |
| SNORD96               | 645    | 349   | -0.89 |
| chr7.trna861-LeuTAG   | 3019   | 1548  | -0.96 |
| RNaseP_nuc            | 2291   | 1102  | -1.06 |
| chr17.trna113-GlyCCC  | 100125 | 47317 | -1.08 |
| chr6.trna317-GlyCCC   | 100125 | 47317 | -1.08 |
| SNORD121A             | 1613   | 675   | -1.26 |
| SNORD73               | 979    | 405   | -1.27 |
| SNORD69               | 356    | 146   | -1.28 |
| chr11.trna945-ArgCCG  | 2134   | 737   | -1.53 |
| SNORA7                | 990    | 304   | -1.71 |
| SNORD63               | 13726  | 3531  | -1.96 |
| snoU2-25              | 1301   | 304   | -2.10 |
| SNORD41               | 20345  | 4206  | -2.27 |

---

**Table S5. The list of miRNA transcript units whose proximal (1-kb) or distal (5-kb) promoter regions are directly targeted by MeCP2 in postnatal cerebella**

Note:

1. MiRNA TSS (column 4) and strand (column 5) indicates the predicted transcription start sites (TSSs) of primary miRNA transcripts and their transcription orientation, respectively (Marson et al. , 2008).
2. Column 1-3 represent Mecp2 bound regions (peaks) that are within 5kb genomic regions flanking TSSs of predicted miRNA transcripts.
3. Up-regulated and down-regulated miRNAs in KO cerebella at 6-week are highlighted in red and green, respectively.
4. Mature miRNA consistently dys-regulated at both 6-week and 8-week are underlined.
5. Mecp2 binding sites that are within predicted miRNA proximal promoters (-1kb to +1kb relative to TSS) are highlighted in bold.

| PEAK_Chr    | PEAK_START       | PEAK_END         | miRNA TSS | strand | Primary miRNA transcripts                                                |
|-------------|------------------|------------------|-----------|--------|--------------------------------------------------------------------------|
| chr9        | 50854658         | 50854917         | 50855975  | -      | <u>mmu-mir-34c/mmuc-mir-34b</u>                                          |
| <b>chr9</b> | <b>50856963</b>  | <b>50857515</b>  | 50855975  | -      | <u>mmu-mir-34c/mmuc-mir-34b</u>                                          |
| chr9        | 50860174         | 50860778         | 50855975  | -      | <u>mmu-mir-34c/mmuc-mir-34b</u>                                          |
| chr9        | 106009049        | 106009221        | 106006787 | +      | mmu-mir-135a-1                                                           |
| <b>chr9</b> | <b>112080066</b> | <b>112080415</b> | 112079730 | -      | mmu-mir-128b                                                             |
| chr9        | 112081666        | 112082915        | 112079730 | -      | mmu-mir-128b                                                             |
| <b>chr8</b> | <b>87072122</b>  | <b>87072430</b>  | 87071400  | -      | <u>mmu-mir-181d/mmuc-mir-181c</u>                                        |
| chr8        | 87072122         | 87072430         | 87075322  | -      | <u>mmu-mir-181d/mmuc-mir-181c</u>                                        |
| chr7        | 18338786         | 18339344         | 18335227  | +      | <u>mmu-mir-330</u>                                                       |
| <b>chr7</b> | <b>18338786</b>  | <b>18339344</b>  | 18339655  | +      | <u>mmu-mir-330</u>                                                       |
| chr7        | 44993472         | 44993821         | 44989813  | +      | <u>mmu-mir-150</u>                                                       |
| chr7        | 64029627         | 64030076         | 64032877  | +      | mmu-mir-211                                                              |
| chr7        | 96043287         | 96043844         | 96046435  | +      | mmu-mir-708                                                              |
| chr7        | 99406318         | 99407171         | 99409568  | +      | <u>mmu-mir-326</u>                                                       |
| chr7        | 99407769         | 99408318         | 99409568  | +      | <u>mmu-mir-326</u>                                                       |
| <b>chr7</b> | <b>101294682</b> | <b>101294831</b> | 101295518 | +      | mmu-mir-139                                                              |
| chr5        | 24094893         | 24095242         | 24099289  | +      | <u>mmu-mir-671</u>                                                       |
| chr5        | 138398958        | 138399207        | 138401650 | -      | <u>mmu-mir-25/mmuc-mir-93/mmuc-mir-106</u> (removed from other analysis) |
| chr5        | 139628870        | 139629219        | 139626575 | -      | mmu-mir-339                                                              |
| chr4        | 40909644         | 40910158         | 40911203  | +      | mmu-mir-207                                                              |
| chr4        | 40909853         | 40910002         | 40911203  | +      | mmu-mir-207                                                              |
| chr4        | 120330456        | 120331105        | 120329210 | -      | mmu-mir-30c-1/mmuc-mir-30e                                               |

|              |                  |                  |           |                                                                                                                                                                                                                                                                                                                                                                                                                                                                         |
|--------------|------------------|------------------|-----------|-------------------------------------------------------------------------------------------------------------------------------------------------------------------------------------------------------------------------------------------------------------------------------------------------------------------------------------------------------------------------------------------------------------------------------------------------------------------------|
| chr3         | 17983112         | 17983844         | 17986735  | + <a href="#">mmu-mir-124-2</a>                                                                                                                                                                                                                                                                                                                                                                                                                                         |
| chr3         | 88296498         | 88296973         | 88293150  | + <a href="#">mmu-mir-9-1</a>                                                                                                                                                                                                                                                                                                                                                                                                                                           |
| chr3         | 88296498         | 88296973         | 88300421  | + <a href="#">mmu-mir-9-1</a>                                                                                                                                                                                                                                                                                                                                                                                                                                           |
| <b>chr3</b>  | <b>118423690</b> | <b>118424950</b> | 118425726 | + <a href="#">mmu-mir-137</a>                                                                                                                                                                                                                                                                                                                                                                                                                                           |
| chr3         | 118427238        | 118428285        | 118425726 | + <a href="#">mmu-mir-137</a>                                                                                                                                                                                                                                                                                                                                                                                                                                           |
| chr3         | 127538252        | 127538401        | 127537000 | + <a href="#">mmu-mir-302b/mmu-mir-302c/mmu-mir-302a/mmu-mir-302d/mmu-mir-367</a>                                                                                                                                                                                                                                                                                                                                                                                       |
| chr19        | 22203263         | 22203814         | 22206213  | + mmu-mir-204                                                                                                                                                                                                                                                                                                                                                                                                                                                           |
| chr18        | 61528119         | 61528191         | 61525800  | - mmu-mir-378                                                                                                                                                                                                                                                                                                                                                                                                                                                           |
| chr18        | 61771246         | 61771767         | 61774675  | - <a href="#">mmu-mir-143</a>                                                                                                                                                                                                                                                                                                                                                                                                                                           |
| chr18        | 61771246         | 61771767         | 61774500  | - mmu-mir-145                                                                                                                                                                                                                                                                                                                                                                                                                                                           |
| chr16        | 13362868         | 13363386         | 13360250  | + mmu-mir-365-1/mmu-mir-193b                                                                                                                                                                                                                                                                                                                                                                                                                                            |
| chr16        | 24307390         | 24307639         | 24308838  | + mmu-mir-28                                                                                                                                                                                                                                                                                                                                                                                                                                                            |
| chr16        | 24311990         | 24312647         | 24308838  | + mmu-mir-28                                                                                                                                                                                                                                                                                                                                                                                                                                                            |
| chr16        | 93255794         | 93256148         | 93258000  | + mmu-mir-802                                                                                                                                                                                                                                                                                                                                                                                                                                                           |
| <b>chr16</b> | <b>93258662</b>  | <b>93259713</b>  | 93258000  | + mmu-mir-802                                                                                                                                                                                                                                                                                                                                                                                                                                                           |
| chr15        | 73248197         | 73248456         | 73250468  | - <a href="#">mmu-mir-151</a>                                                                                                                                                                                                                                                                                                                                                                                                                                           |
| chr15        | 73252297         | 73252746         | 73250468  | - <a href="#">mmu-mir-151</a>                                                                                                                                                                                                                                                                                                                                                                                                                                           |
| chr15        | 81972908         | 81973260         | 81974458  | + <a href="#">mmu-mir-33</a>                                                                                                                                                                                                                                                                                                                                                                                                                                            |
| <b>chr15</b> | <b>103100732</b> | <b>103100981</b> | 103100932 | + mmu-mir-148b                                                                                                                                                                                                                                                                                                                                                                                                                                                          |
| chr14        | 113924383        | 113925008        | 113921800 | + mmu-mir-17/mmu-mir-18a/mmu-mir-19a/ <a href="#">mmu-mir-20a</a>                                                                                                                                                                                                                                                                                                                                                                                                       |
| chr13        | 114152046        | 114152238        | 114155325 | + mmu-mir-449b/mmu-mir-449a                                                                                                                                                                                                                                                                                                                                                                                                                                             |
| <b>chr13</b> | <b>114154008</b> | <b>114154961</b> | 114155325 | + mmu-mir-449b/mmu-mir-449a                                                                                                                                                                                                                                                                                                                                                                                                                                             |
| chr13        | 114159582        | 114159836        | 114155325 | + mmu-mir-449b/mmu-mir-449a                                                                                                                                                                                                                                                                                                                                                                                                                                             |
| chr12        | 109285806        | 109286426        | 109284453 | + mmu-mir-345<br><a href="#">mmu-mir-341/mmu-mir-370/mmu-mir-882/mmu-mir-379/mmu-mir-411/mmu-mir-299/mmu-mir-380/mmu-mir-323/mmu-mir-758/mmu-mir-329/mmu-mir-494/mmu-mir-666/mmu-mir-543/mmu-mir-495/mmu-mir-368/mmu-mir-654/mmu-mir-376b/mmu-mir-376a/mmu-mir-300/mmu-mir-381/mmu-mir-487b/mmu-mir-539/mmu-mir-544/mmu-mir-382/mmu-mir-134/mmu-mir-485/mmu-mir-453/mmu-mir-154/mmu-mir-496/mmu-mir-377/mmu-mir-541/mmu-mir-409/mmu-mir-412/mmu-mir-369/mmu-mir-410</a> |
| <b>chr12</b> | <b>110044260</b> | <b>110045917</b> | 110043900 | + 541/mmu-mir-409/mmu-mir-412/ <a href="#">mmu-mir-369/mmu-mir-410</a>                                                                                                                                                                                                                                                                                                                                                                                                  |
| <b>chr11</b> | <b>70047944</b>  | <b>70048138</b>  | 70048625  | + <a href="#">mmu-mir-497/mmu-mir-195</a>                                                                                                                                                                                                                                                                                                                                                                                                                               |

|              |                  |                  |           |               |
|--------------|------------------|------------------|-----------|---------------|
| chr11        | 87568072         | 87568249         | 87572275  | + mmu-mir-142 |
| chr11        | 119865144        | 119865793        | 119863040 | - mmu-mir-338 |
| <b>chr10</b> | <b>122390142</b> | <b>122390855</b> | 122391350 | - mmu-let-7i  |
| chr1         | 160194099        | 160194748        | 160199016 | + mmu-mir-488 |
| chr1         | 195213122        | 195213659        | 195211200 | - mmu-mir-205 |

---

**Table S6. The list of transcriptionally detectable miRNAs generated from the polycistronic transcript within the *Dlk1-Gt12* imprinting domain**

Note:

1. Mature miRNAs significantly up-regulated ( $\log_2(KO/WT) > 0.58$ ) at the pre-/early-symptomatic stage (6-week) are highlighted in bold.
2. Mature miRNAs consistently dys-regulated ( $> 1.5$ -fold) at both 6-week and 8-week are underlined.
3. Columns 2-4 represent genomic coordinates of clustered sequencing reads mapped to guide and passenger strand of annotated miRNA precursors.

| miRNA_precursor           | chr   | start     | end       | strand | WT_read_count | KO_read_count | FC(KO/WT) | $\log_2(KO/WT)$ |
|---------------------------|-------|-----------|-----------|--------|---------------|---------------|-----------|-----------------|
| <b>mmu-miR-341</b>        | chr12 | 110849766 | 110849794 | +      | 210           | 320           | 1.52      | 0.61            |
| mmu-miR-370               | chr12 | 110856477 | 110856506 | +      | 30            | 39            | 1.30      | 0.38            |
| mmu-miR-370               | chr12 | 110856515 | 110856541 | +      | 32            | 34            | 1.06      | 0.09            |
| mmu-miR-379               | chr12 | 110947276 | 110947301 | +      | 212           | 255           | 1.20      | 0.27            |
| mmu-miR-379               | chr12 | 110947313 | 110947336 | +      | 29            | 34            | 1.17      | 0.23            |
| mmu-miR-411               | chr12 | 110948400 | 110948425 | +      | 77            | 104           | 1.35      | 0.43            |
| mmu-miR-411               | chr12 | 110948436 | 110948459 | +      | 67            | 59            | 0.88      | -0.18           |
| <b><u>mmu-miR-299</u></b> | chr12 | 110948851 | 110948880 | +      | 46            | 70            | 1.52      | 0.61            |
| <b><u>mmu-miR-299</u></b> | chr12 | 110948883 | 110948910 | +      | 39            | 72            | 1.85      | 0.88            |
| <b>mmu-miR-380</b>        | chr12 | 110950053 | 110950074 | +      | 38            | 58            | 1.53      | 0.61            |
| <b>mmu-miR-323</b>        | chr12 | 110950768 | 110950792 | +      | 123           | 210           | 1.71      | 0.77            |
| mmu-miR-329               | chr12 | 110951714 | 110951739 | +      | 323           | 242           | 0.75      | -0.42           |
| mmu-miR-329               | chr12 | 110951752 | 110951777 | +      | 191           | 143           | 0.75      | -0.42           |
| mmu-miR-494               | chr12 | 110953578 | 110953603 | +      | 45            | 64            | 1.42      | 0.51            |
| <b><u>mmu-miR-666</u></b> | chr12 | 110955314 | 110955339 | +      | 11            | 20            | 1.82      | 0.86            |
| <b><u>mmu-miR-666</u></b> | chr12 | 110955351 | 110955377 | +      | 752           | 1229          | 1.63      | 0.71            |
| mmu-miR-543               | chr12 | 110955479 | 110955502 | +      | 31            | 33            | 1.06      | 0.09            |
| <b><u>mmu-miR-543</u></b> | chr12 | 110955513 | 110955540 | +      | 162           | 369           | 2.28      | 1.19            |
| <b><u>mmu-miR-495</u></b> | chr12 | 110957006 | 110957027 | +      | 450           | 929           | 2.06      | 1.05            |
| mmu-miR-667               | chr12 | 110958231 | 110958256 | +      | 16            | 13            | 0.81      | -0.30           |
| mmu-miR-667               | chr12 | 110958272 | 110958297 | +      | 99            | 137           | 1.38      | 0.47            |
| mmu-miR-376c              | chr12 | 110960943 | 110960969 | +      | 76            | 65            | 0.86      | -0.23           |
| mmu-miR-376c              | chr12 | 110960981 | 110961005 | +      | 78            | 115           | 1.47      | 0.56            |
| mmu-miR-376b              | chr12 | 110961681 | 110961706 | +      | 282           | 276           | 0.98      | -0.03           |
| mmu-miR-376b              | chr12 | 110961718 | 110961743 | +      | 143           | 163           | 1.14      | 0.19            |
| mmu-miR-376a              | chr12 | 110961997 | 110962021 | +      | 29            | 41            | 1.41      | 0.50            |
| mmu-miR-376a              | chr12 | 110962034 | 110962059 | +      | 307           | 379           | 1.23      | 0.30            |
| <b>mmu-miR-300</b>        | chr12 | 110962529 | 110962555 | +      | 10            | 33            | 3.30      | 1.72            |
| mmu-miR-300               | chr12 | 110962574 | 110962600 | +      | 516           | 702           | 1.36      | 0.44            |
| mmu-miR-381               | chr12 | 110965040 | 110965064 | +      | 28            | 20            | 0.71      | -0.49           |

|                    |       |           |           |   |     |      |      |       |
|--------------------|-------|-----------|-----------|---|-----|------|------|-------|
| <b>mmu-miR-381</b> | chr12 | 110965080 | 110965106 | + | 489 | 841  | 1.72 | 0.78  |
| mmu-miR-487b       | chr12 | 110965593 | 110965619 | + | 580 | 700  | 1.21 | 0.27  |
| mmu-miR-539        | chr12 | 110966347 | 110966370 | + | 18  | 23   | 1.28 | 0.35  |
| <b>mmu-miR-544</b> | chr12 | 110967582 | 110967606 | + | 82  | 132  | 1.61 | 0.69  |
| <b>mmu-miR-382</b> | chr12 | 110971992 | 110972018 | + | 679 | 1063 | 1.57 | 0.65  |
| mmu-miR-382        | chr12 | 110972028 | 110972053 | + | 104 | 153  | 1.47 | 0.56  |
| mmu-miR-134        | chr12 | 110972356 | 110972380 | + | 112 | 104  | 0.93 | -0.11 |
| mmu-miR-668        | chr12 | 110972984 | 110973008 | + | 160 | 178  | 1.11 | 0.15  |
| mmu-miR-154        | chr12 | 110976649 | 110976674 | + | 192 | 184  | 0.96 | -0.06 |
| <b>mmu-miR-154</b> | chr12 | 110976685 | 110976709 | + | 82  | 135  | 1.65 | 0.72  |
| mmu-miR-496        | chr12 | 110977376 | 110977401 | + | 80  | 102  | 1.28 | 0.35  |
| <b>mmu-miR-377</b> | chr12 | 110978761 | 110978786 | + | 26  | 40   | 1.54 | 0.62  |
| mmu-miR-541        | chr12 | 110980633 | 110980658 | + | 638 | 703  | 1.10 | 0.14  |
| mmu-miR-541        | chr12 | 110980675 | 110980700 | + | 17  | 20   | 1.18 | 0.23  |
| mmu-miR-409        | chr12 | 110981383 | 110981408 | + | 59  | 80   | 1.36 | 0.44  |
| mmu-miR-409        | chr12 | 110981414 | 110981441 | + | 196 | 170  | 0.87 | -0.21 |
| mmu-miR-369        | chr12 | 110981642 | 110981666 | + | 118 | 147  | 1.25 | 0.32  |
| <b>mmu-miR-369</b> | chr12 | 110981676 | 110981699 | + | 15  | 36   | 2.40 | 1.26  |
| <b>mmu-miR-410</b> | chr12 | 110981975 | 110981998 | + | 14  | 50   | 3.57 | 1.84  |

---
